# Supplementary material for: Ecto-ADP-ribosyltransferase ARTC2.1 functionally modulates FcγR1 and FcγR2B on murine microglia
Source: Sci Rep. 2017 Nov 28;7:16477. doi: 10.1038/s41598-017-16613-w (PMC5705771; doi:10.1038/s41598-017-16613-w)
Supplement: Supplementary file 1 — Supplementary Data [file 41598_2017_16613_MOESM1_ESM.pdf]

# **Ecto-ADP-ribosyltransferase ARTC2.1 functionally modulates FcγR1 and FcγR2B on murine microglia**

Björn Rissiek<sup>1</sup>, Stephan Menzel<sup>2</sup>, Mario Leutert<sup>3</sup>, Maike Cordes<sup>1</sup>, Sarah Behr<sup>1</sup>, Larissa Jank<sup>1</sup>,  
Peter Ludewig<sup>1</sup>, Mathias Gelderblom<sup>1</sup>, Anne Rissiek<sup>2</sup>, Sahil Adriouch<sup>2,4</sup>, Friedrich Haag<sup>2</sup>,  
Michael O. Hottiger<sup>3</sup>, Friedrich Koch-Nolte<sup>2†</sup>, Tim Magnus<sup>1†</sup>

<sup>1</sup>Department of Neurology and <sup>2</sup>Institute of Immunology at  
University Medical Centre, Hamburg-Eppendorf, Germany;

<sup>3</sup>Department of Molecular Mechanisms of Disease, University of Zurich, Switzerland

<sup>4</sup>Normandie Univ, UNIROUEN, INSERM, U1234, Rouen, France; Institute for Research and  
Innovation in Biomedicine (IRIB), Rouen, France.

Equally contributing †senior authors

To whom correspondence should be addressed:

Dr. Björn Rissiek  
University Medical Center Hamburg-Eppendorf  
Department of Neurology  
Martinistraße 52  
20246 Hamburg-Eppendorf  
Germany  
Tel.: +49-40-7410-58168  
Fax.: +49-40-7410-55591  
E-mail: [b.rissiek@uke.de](mailto:b.rissiek@uke.de)

## Supplementary Information

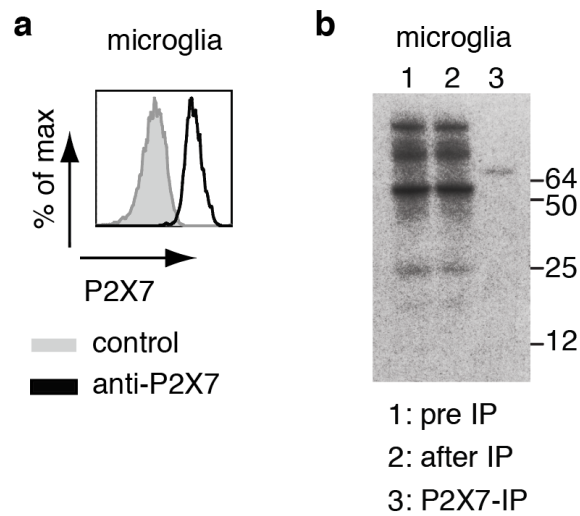

### Supplementary Figure 1: ADP-ribosylation of P2X7 on microglia

**(a)** CD11b<sup>+</sup> microglia from BALB/c WT mixed glial cells were labeled with anti-P2X7 or isotype control antibodies. **(b)** BALB/c WT mixed glial cells were stimulated with LPS/U0126 for 24h and microglia were isolated via FACS sorting of CD11b<sup>+</sup>GLAST<sup>-</sup> cells. Sorted cells were lysed and P2X7 protein was immunoprecipitated (IP) using anti-P2X7 (RH23A44). Pre-IP, after-IP and P2X7-IP samples were size fractionated on SDS PAGE and subjected to autoradiography. Data are representative of 2 independent experiments.
